# Supplementary material for: ERAP1 allotypes shape the epitope repertoire of virus-specific CD8+ T cell responses in acute hepatitis C virus infection
Source: PubMed Central journal article supplement — J Hepatol. 2019 Jun;70(6):1072–81. doi: 10.1016/j.jhep.2019.01.034 (PMC6527866; doi:10.1016/j.jhep.2019.01.034), 2019-06
Supplement: mmc1.pdf [file mmc1.pdf]

# **ERAP1 allotypes shape the epitope repertoire of virus-specific CD8<sup>+</sup> T cell responses in acute hepatitis C virus infection**

Janine Kemming, Emma Reeves, Katja Nitschke, Vanessa Widmeier, Florian Emmerich, Tobias Hermle, Emma Gostick, Andreas Walker, Jörg Timm, David A. Price, Maike Hofmann, Robert Thimme, Edward James\*, Christoph Neumann-Haefelin

## Table of contents

|                            |    |
|----------------------------|----|
| Supplementary methods..... | 2  |
| Fig. S1.....               | 5  |
| Fig. S2.....               | 6  |
| Fig. S3.....               | 7  |
| Fig. S4.....               | 8  |
| Fig. S5.....               | 9  |
| Table S1.....              | 10 |

## **Supplementary methods**

### *CD8 selection and polyclonal expansion of PBMCs*

Procedures were carried out as described previously [1]. Briefly, CD8<sup>+</sup> T cells were isolated from PBMCs via magnetic separation using anti-CD8-loaded Dynabeads (Invitrogen, Germany), stimulated once with 0.04 µg/mL anti-CD3 (Immunotech, France), and fed every 3 days with complete medium containing 100 U/mL recombinant IL-2 (Stemcell Technologies, Germany). Cells were used for experimental purposes after 2–3 weeks.

### *Peptide-specific T cell lines*

PBMCs were activated with peptides as described previously [2]. Briefly, 4 x 10<sup>6</sup> PBMCs were stimulated once with 10 µg/mL peptide and 0.5 µg/mL anti-CD28 (BD Biosciences, Germany) and fed every 3 days with complete medium containing 20 U/mL recombinant IL-2 (Stemcell Technologies, Germany). Peptide-specific T cell lines were used for experimental purposes after 14 days.

### *Intracellular IFN-γ staining*

Procedures were carried out as described previously [3]. Briefly, expanded CD8<sup>+</sup> T cells or peptide-specific T cell lines (0.2 x 10<sup>6</sup> cells per well in a 96-well plate) were stimulated with peptides (10 µg/mL) or peptide-loaded autologous or allogeneic Epstein-Barr virus (EBV)-immortalized B cells in the presence of 50 U/mL recombinant IL-2 and 1 µL/mL brefeldin A (BD Biosciences, Germany). After 5 hours, cells were blocked with IgG1 antibodies, stained with 7-AAD and anti-CD8,

fixed/permeabilized with Cytofix/Cytoperm, stained with anti-IFN- $\gamma$ , and fixed in 100  $\mu$ L 2% PFA in PBS (all reagents from BD Pharmingen, Germany). Data were acquired using a FACS Canto flow cytometer (BD Biosciences, Germany) and analyzed with FlowJo software version 10 (Tree Star, OR, USA).

#### *HLA/peptide multimer staining*

Procedures were carried out as described previously [4]. Briefly,  $1 \times 10^6$  cells per well in a 96-well plate were incubated with HLA/peptide multimer for 15 minutes at 37 °C. Cells were then washed three times with phosphate-buffered saline containing 1% fetal calf serum, blocked with IgG1 antibodies, stained with anti-CD8, washed again three times, and fixed in 100  $\mu$ L 2% PFA in PBS (all reagents from BD Pharmingen, Germany). Data were acquired using a FACSCanto flow cytometer (BD Biosciences, Germany) and analyzed with FlowJo software version 10 (Tree Star, OR, USA).

#### *Viral sequence analysis*

Viral RNA was extracted from patient sera using the QIAmp Viral RNA Mini Kit according to the manufacturer's instructions and subsequently transcribed into cDNA by SuperScript™ III Reverse Transcriptase (Invitrogen, Germany) using specific reverse primers (see CTAT Table for primer sequences). Nested PCR (see CTAT Table for primer sequences) was performed using the GoTaq® Flexi DNA Polymerase Kit (Promega, USA) to amplify sequences which were sent to GATC Biotech (Konstanz, Germany) for Sanger Sequencing. Bulk sequences were analyzed using Geneious 11.0.5 (Biomatters Ltd., NZ).

## *References*

- [1] Thimme R, Bukh J, Spangenberg HC, Wieland S, Pemberton J, Steiger C, et al. Viral and immunological determinants of hepatitis C virus clearance, persistence, and disease. *Proceedings of the National Academy of Sciences of the United States of America* 2002;99:15661-15668.
- [2] Neumann-Haefelin C, McKiernan S, Ward S, Viazov S, Spangenberg HC, Killinger T, et al. Dominant influence of an HLA-B27 restricted CD8+ T cell response in mediating HCV clearance and evolution. *Hepatology* 2006;43:563-572.
- [3] Thimme R, Oldach D, Chang KM, Steiger C, Ray SC, Chisari FV. Determinants of viral clearance and persistence during acute hepatitis C virus infection. *The Journal of experimental medicine* 2001;194:1395-1406.
- [4] Bengsch B, Spangenberg HC, Kersting N, Neumann-Haefelin C, Panther E, von Weizsacker F, et al. Analysis of CD127 and KLRG1 expression on hepatitis C virus-specific CD8+ T cells reveals the existence of different memory T-cell subsets in the peripheral blood and liver. *Journal of virology* 2007;81:945-953.

## Supplementary Figures

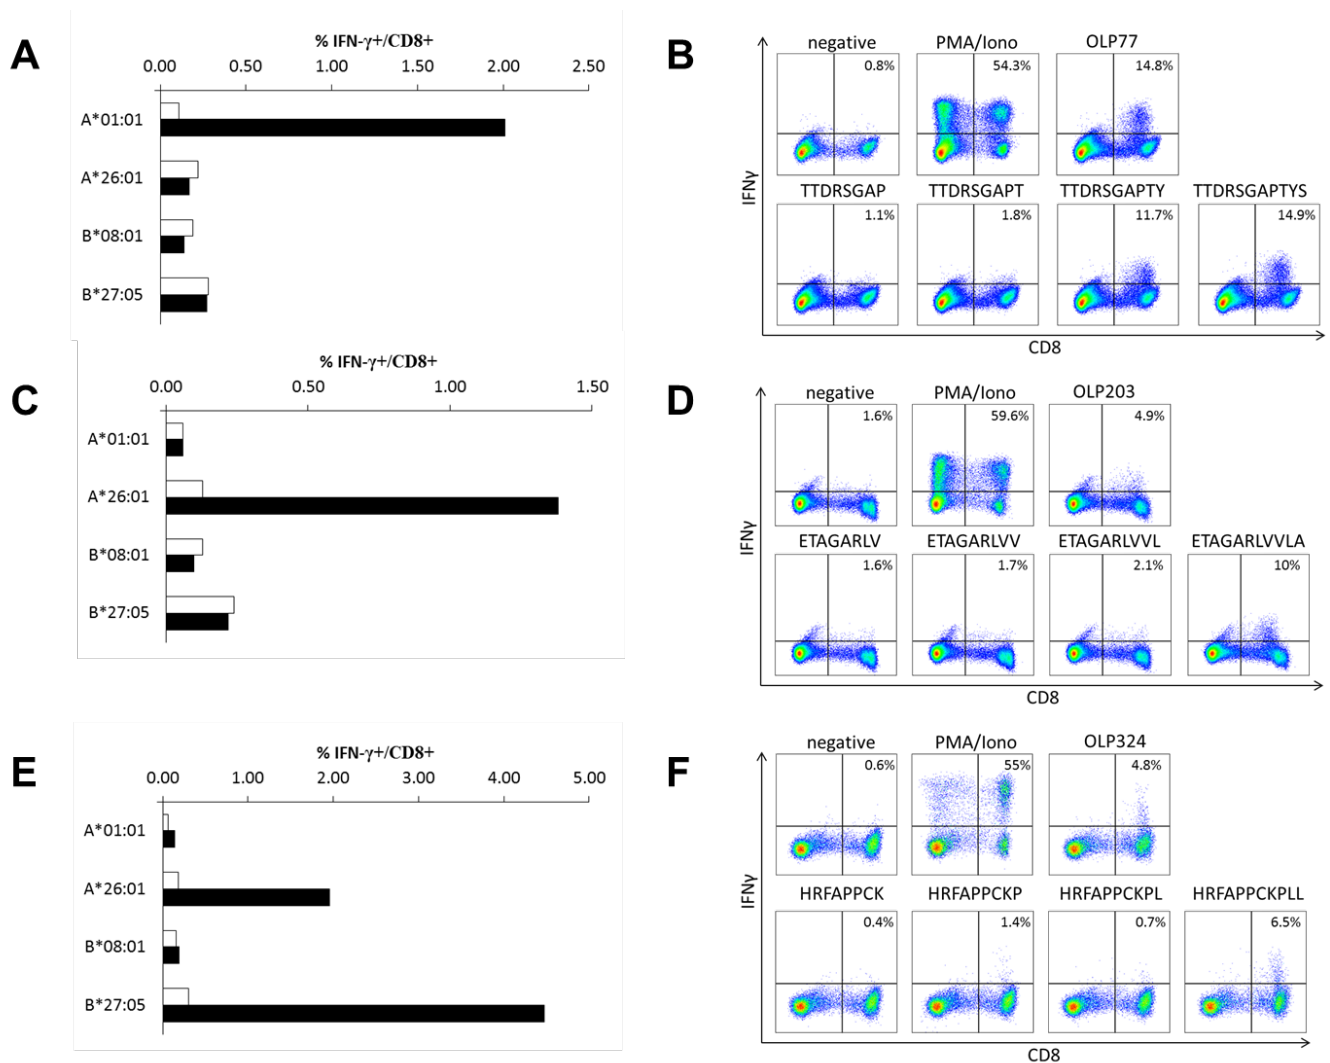

**Fig. S1. HLA class I restriction and fine mapping of HCV-derived CD8<sup>+</sup> T cell epitopes identified in donor MM. (A, C, E)** HLA class I restriction analysis for CD8<sup>+</sup> T cells targeting olp-77 (A), olp-203 (C), and olp-323/324 (E). CD8<sup>+</sup> T cell lines specific for each olp were tested for IFN- $\gamma$  production after incubation with EBV-immortalized B cell lines partially matched for the indicated HLA class I alleles, either unloaded (white bars) or loaded with the relevant olp (black bars). **(B, D, F)** Fine mapping experiments for CD8<sup>+</sup> T cell epitopes in olp-77 (B), olp-203 (D), and olp-323/324 (F). CD8<sup>+</sup> T cell lines specific for each olp were incubated with the indicated 8–11mer peptides and tested for IFN- $\gamma$  production.

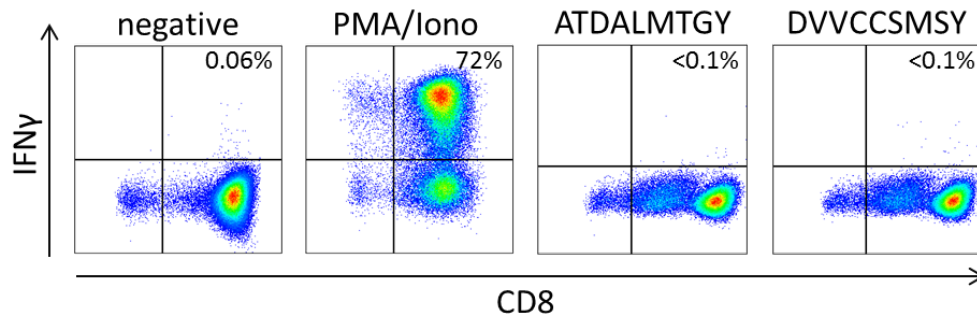

**Fig. S2. Absence of CD8<sup>+</sup> T cell responses to classically immunodominant HCV-derived epitopes restricted by HLA-A\*01 or HLA-A\*26 in donor MM.** CD8<sup>+</sup> T cells from donor MM were tested for IFN- $\gamma$  production after stimulation with the epitopes HLA-A\*26:01/NS3<sub>1436-1444</sub> (ATDALMTGY) or HLA-B\*27:05/NS5A/B<sub>2416-2424</sub> (DVVCCSMSY). Medium alone served as the negative control; medium supplemented with PMA and ionomycin served as the positive control.

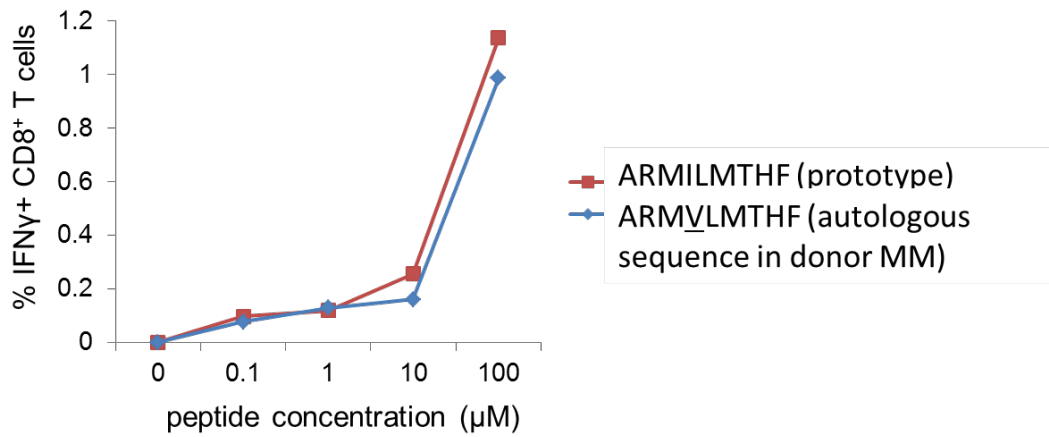

**Fig. S3. Cross-recognition of the prototype and autologous variant HLA-B\*27:05-restricted NS5B<sub>2841-2849</sub> epitopes by CD8<sup>+</sup> T cells from donor MM.** CD8<sup>+</sup> T cells from donor MM were tested for IFN- $\gamma$  production after stimulation with serial dilutions of ARMILMTHF (prototype epitope) or ARMVLMTHF (autologous variant).

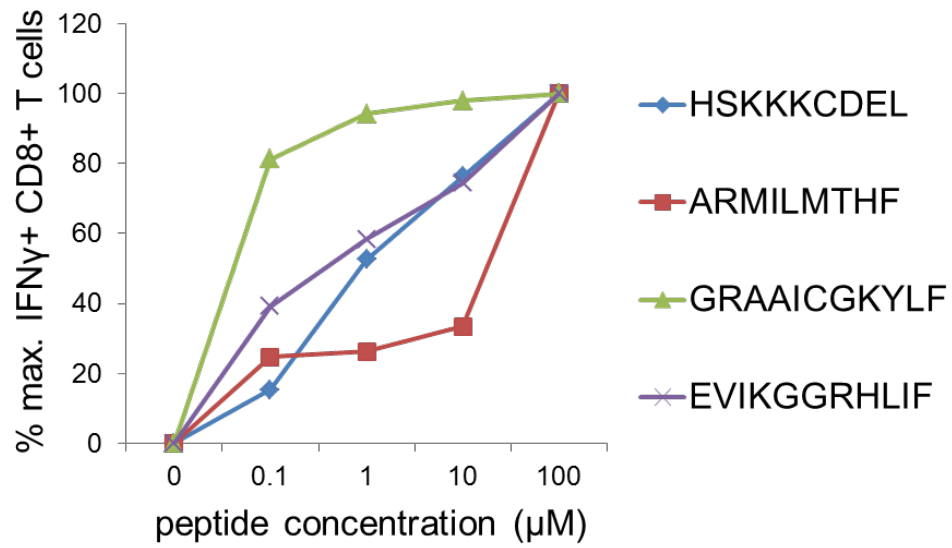

**Fig. S4. Functional avidity of four HCV-specific CD8+ T cell epitopes in donor MM.** Epitope-specific CD8+ T cell responses were tested on polyclonally expanded CD8+ T cells from donor MM using intracellular IFN- $\gamma$  staining with peptides in serial dilution as read-out. The greatest response per peptide was set to 100%.



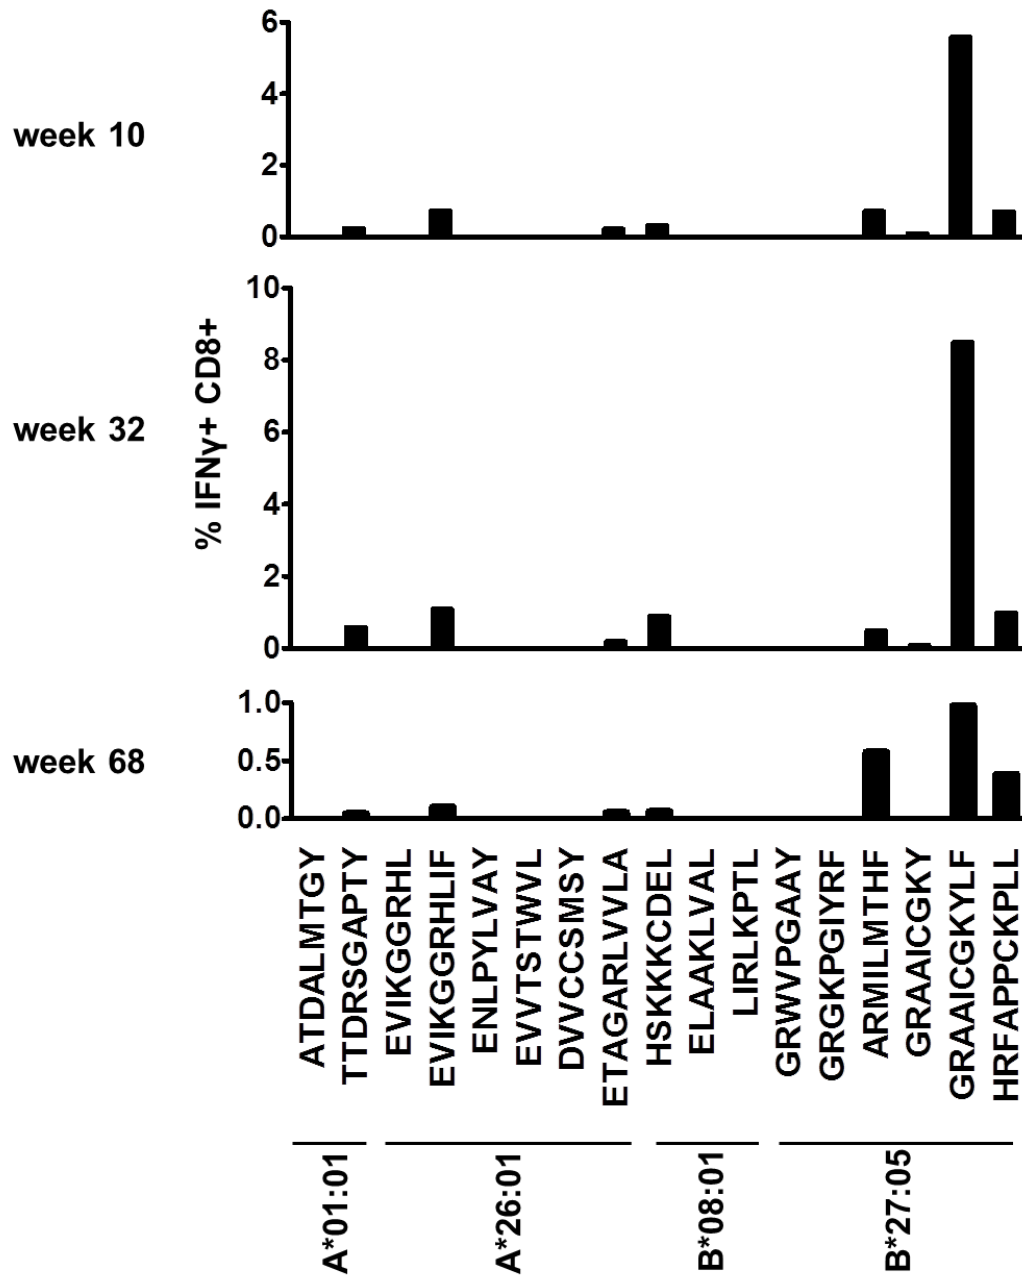

**Fig. S5.** Immunodominance pattern in donor MM over time. Epitope-specific CD8+ T cell responses were tested on polyclonally expanded CD8+ T cells from donor MM using intracellular IFN- $\gamma$  staining as read-out at the time-points indicated.

## Supplementary Tables

**Table S1. Viral sequences corresponding to epitopes targeted in donor MM and previously described HCV-specific CD8+ T cell epitopes restricted by the HLA class I alleles present in donor MM.** Prototype genotype 1a sequences, sequences from the infection source at the day of transmission as well as viral sequences from donor MM 5 weeks after infection are displayed. A dash ("-") indicates amino acid identity to the prototype.

*(please find the table on the next page)*

Supplementary Table S1

| HLA allele | Described HCV-specific epitopes<br>(immunodominant epitopes in bold) |                                                                                           |  | Epitopes targeted in donor MM (dominant responses in bold) |                                                                                            |  |
|------------|----------------------------------------------------------------------|-------------------------------------------------------------------------------------------|--|------------------------------------------------------------|--------------------------------------------------------------------------------------------|--|
| A*01:01    | <b>NS3</b> <sub>1436-1444</sub>                                      | wild-type: <b>ATDALMTGY</b><br>source: ----- <b>F</b><br>donor MM: ----- <b>F</b>         |  | <b>E2</b> <sub>518-527</sub>                               | wild-type: <b>TTDRSGAPTY</b><br>source: --- <b>K</b> -----<br>donor MM: --- <b>K</b> ----- |  |
| A*26:01    | <b>NS3</b> <sub>1383-1391</sub>                                      | wild-type: EVIKGGRHL<br>source: -T-----<br>donor MM: -T-----                              |  | <b>NS3</b> <sub>1383-1393</sub>                            | <b>EVIKGGRLIF</b><br>-T-----<br>-T-----                                                    |  |
|            | <b>NS3</b> <sub>1582-1590</sub>                                      | wild-type: ENLPYLVAY<br>source: -----<br>donor MM: -----                                  |  |                                                            |                                                                                            |  |
|            | <b>NS3/4A</b> <sub>1654-1662</sub>                                   | wild-type: EVVTSTWVL<br>source: -----<br>donor MM: -----                                  |  |                                                            |                                                                                            |  |
|            | <b>NS5A/B</b> <sub>2416-2424</sub>                                   | wild-type: <b>DVVCCSMSY</b><br>source: -----<br>donor MM: -----                           |  | <b>NS3</b> <sub>1337-1347</sub>                            | wild-type: <b>ETAGARLVVLA</b><br>source: -----<br>donor MM: -----                          |  |
| B*08:01    | <b>NS3</b> <sub>1395-1403</sub>                                      | wild-type: <b>HSKKKCDEL</b><br>source: -----<br>donor MM: -----                           |  | <b>NS3</b> <sub>1395-1403</sub>                            | wild-type: <b>HSKKKCDEL</b><br>source: -----<br>donor MM: -----                            |  |
|            | <b>NS3</b> <sub>1402-1410</sub>                                      | wild-type: ELAAKLVAL<br>source: -----<br>donor MM: -----                                  |  |                                                            |                                                                                            |  |
|            | <b>NS3</b> <sub>1611-1618</sub>                                      | wild-type: LIRLKPTL<br>source: -T-----<br>donor MM: -T-----                               |  |                                                            |                                                                                            |  |
| B*27:05    | <b>P7</b> <sub>780-788</sub>                                         | wild-type: GRWVPGAAY<br>source: -----<br>donor MM: -----                                  |  |                                                            |                                                                                            |  |
|            | <b>NS3</b> <sub>1492-1501</sub>                                      | wild-type: GRGKPGIYRF<br>source: -----<br>donor MM: -----                                 |  |                                                            |                                                                                            |  |
|            | <b>NS5B</b> <sub>2841-2849</sub>                                     | wild-type: <b>ARMILMTHF</b><br>source: --- <b>V</b> -----<br>donor MM: --- <b>V</b> ----- |  | <b>NS5B</b> <sub>2841-2849</sub>                           | wild-type: <b>ARMILMTHF</b><br>source: --- <b>V</b> -----<br>donor MM: --- <b>V</b> -----  |  |
|            | <b>NS5B</b> <sub>2936-2944</sub>                                     | wild-type: GRAAICGKY<br>source: -----<br>donor MM: -----                                  |  | <b>NS5B</b> <sub>2936-2946</sub>                           | wild-type: <b>GRAAICGKYL</b> <b>F</b><br>source: -----<br>donor MM: -----                  |  |
|            |                                                                      |                                                                                           |  | <b>NS5A</b> <sub>2131-2141</sub>                           | wild-type: <b>HRFAPPCKPLL</b><br>source: -----<br>donor MM: -----                          |  |
